# Supplementary material
Source: PubMed Central journal article supplement (PMC7012302)
Supplement: izz266_suppl_supplementary_figure_1.pdf [file izz266_suppl_supplementary_figure_1.pdf]

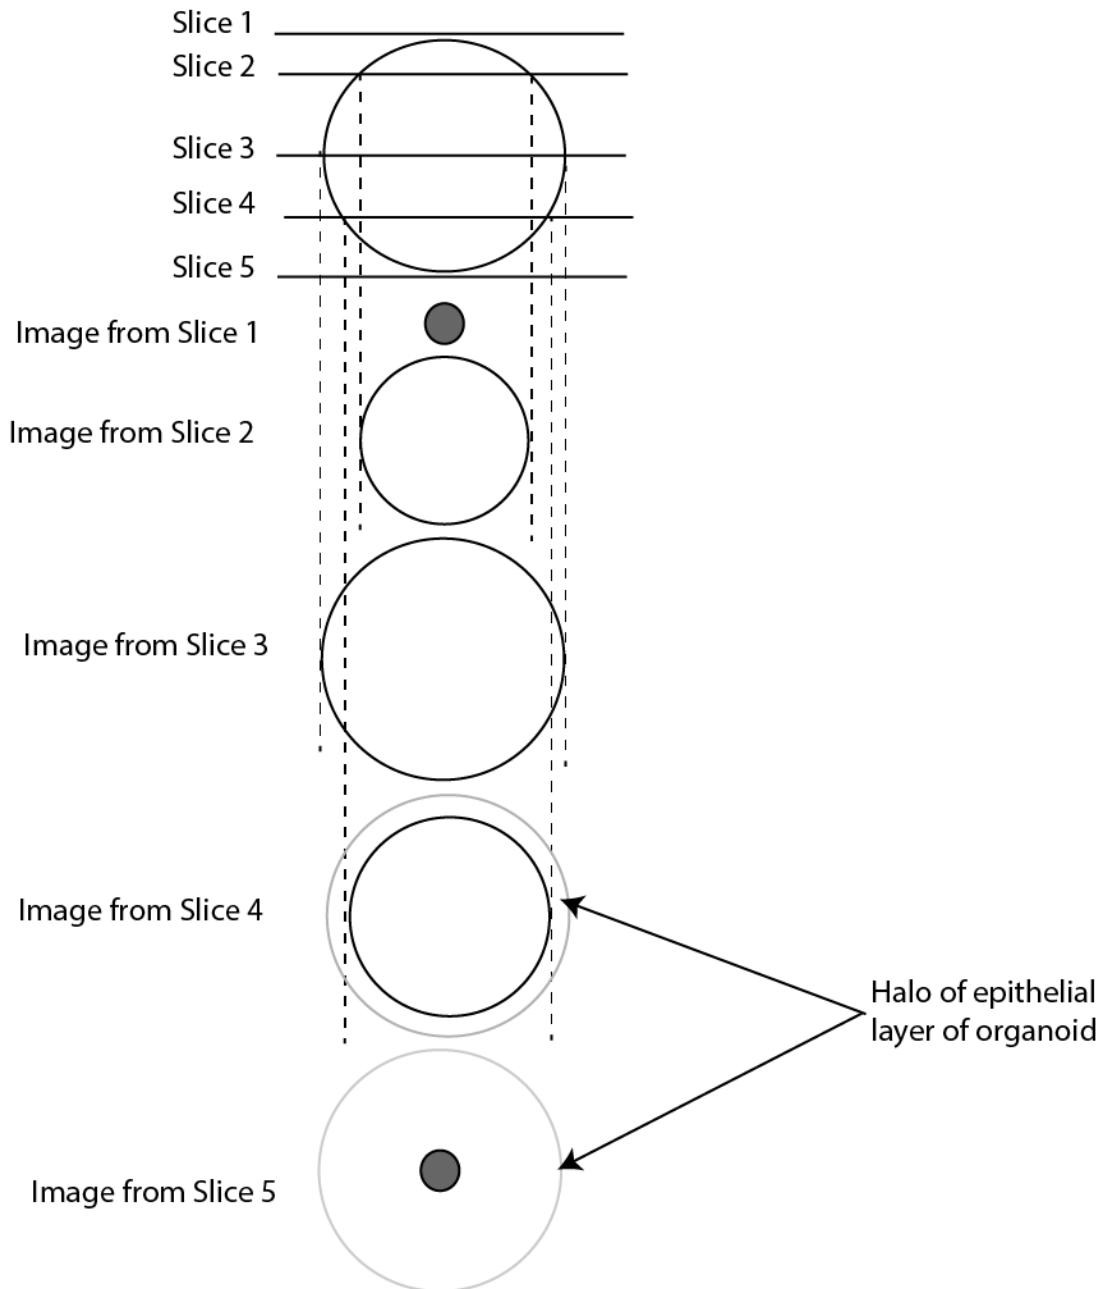

**Supplementary Figure 1: Images of colonoids are taken from optical slices of each colonoid.**

This illustration depicts how the representative panel of optical sections were taken in different planes of one 3D organoid, starting from just above the organoid and finishing below the organoid, thus resulting in differences in diameter of the image.
