# Supplementary material
Source: PubMed Central journal article supplement (PMC7012302)
Supplement: izz266_suppl_supplementary_figure_2.pdf [file izz266_suppl_supplementary_figure_2.pdf]

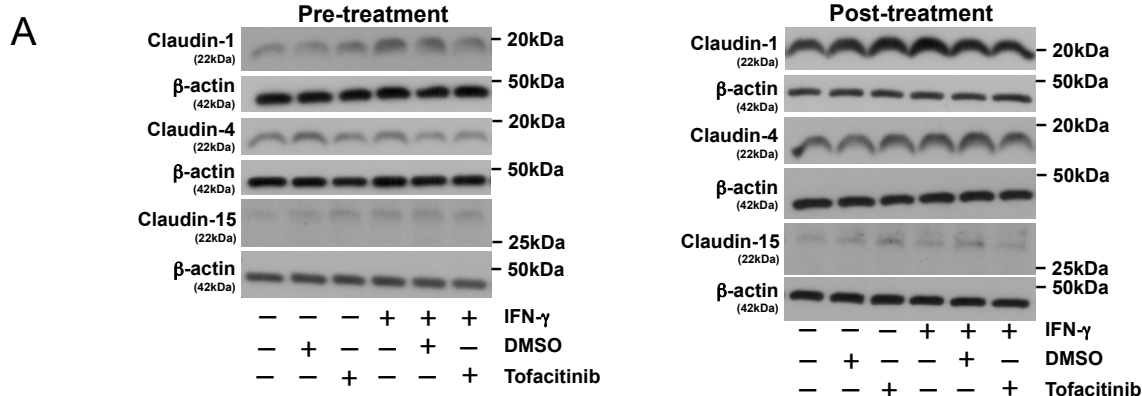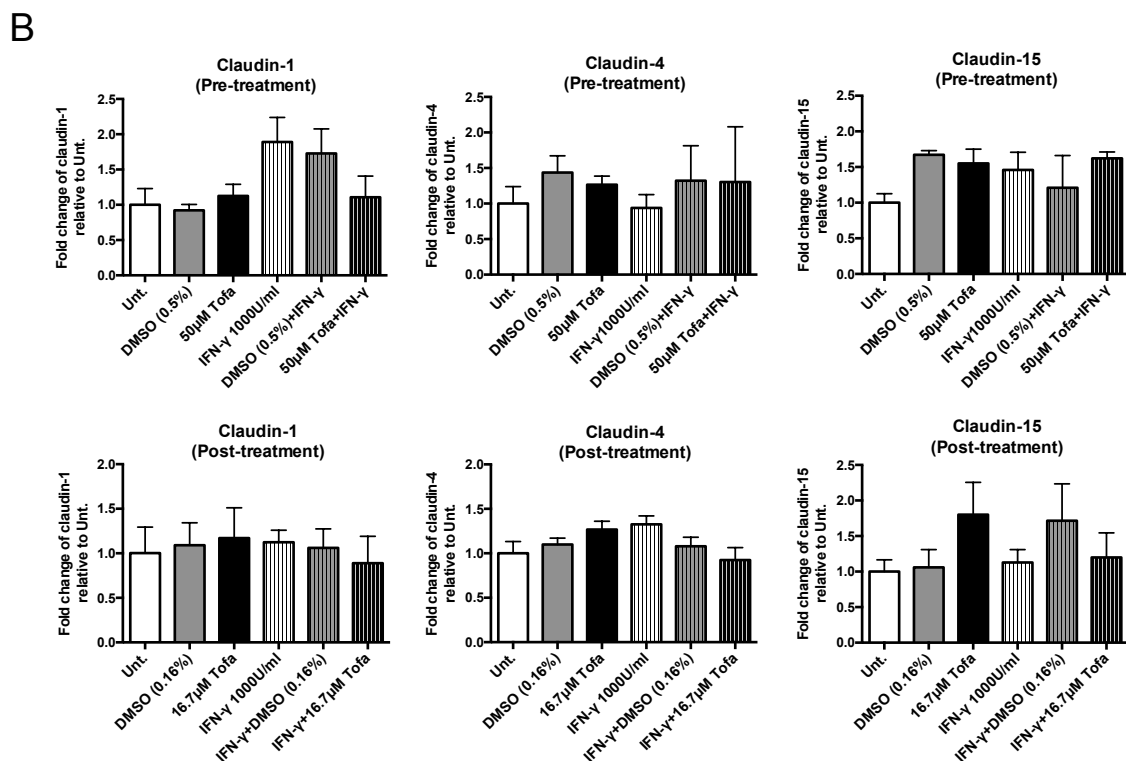

**Supplementary Figure 2: No significant changes in protein expression of claudins -1, -4, and -15 were found with any of the treatments *in vitro*.**

T84 monolayers were subjected to vehicle (DMSO), tofacitinib and IFN- $\gamma$  treatments following the ‘prevention’ and ‘rescue’ protocols. Cells were lysed, whole-cell protein lysates were processed, subjected to Western blotting, and probed for claudin-1, claudin-4 and claudin-15. ( $n = 3-4$ ).
